# Supplementary material for: A Conserved LIR Motif in Connexins Mediates Ubiquitin-Independent Binding to LC3/GABARAP Proteins
Source: Cells. 2020 Apr 7;9(4):902. doi: 10.3390/cells9040902 (PMC7226732; doi:10.3390/cells9040902)
Supplement: Supplementary file 1 [file cells-09-00902-s001.zip › Figures S1 & S2.pdf]

A

|           |               |   |   |   |   |   |   |   |   |   |   |   |   |   |   |   |   |   |   |   |   |   |   |   |   |   |   |   |
|-----------|---------------|---|---|---|---|---|---|---|---|---|---|---|---|---|---|---|---|---|---|---|---|---|---|---|---|---|---|---|
| GJA4      | Cx37          |   |   |   | M | G | D | W | G | F | L | E | K | L | L | D | Q | V | Q | E | H | S | T | V | V | G | K |   |
| GJA5      | Cx40          |   |   |   | M | G | D | W | S | F | L | G | N | F | L | E | E | V | V | H | K | H | S | T | V | V | G | K |
| GJA1      | Cx43          |   |   |   | M | G | D | W | S | A | L | G | K | L | L | D | K | V | Q | A | Y | S | T | A | G | G | K |   |
| GJA3      | Cx46          |   |   |   | M | G | D | W | S | F | L | G | R | L | L | E | N | A | Q | E | H | S | T | V | I | G | K |   |
| GJA8      | Cx50          |   |   |   | M | G | D | W | S | F | L | G | N | I | L | E | E | V | N | E | H | S | T | V | I | G | R |   |
| GJA9      | Cx59          |   |   |   | M | G | D | W | N | L | L | G | D | T | L | E | E | V | H | I | H | S | T | M | I | G | K |   |
| GJA10     | Cx62          |   |   |   | M | G | D | W | N | L | L | G | G | I | L | E | E | V | H | S | H | S | T | I | V | G | K |   |
| GJB7      | Cx25          |   |   |   | M |   | S | W | M | F | L | R | D | L | L | S | G | V | N | K | Y | S | T | G | T | G | W |   |
| GJB2      | Cx26          |   |   |   | M |   | D | W | G | T | L | Q | T | I | L | G | G | V | N | K | H | S | T | S | I | G | K |   |
| GJB6      | Cx30          |   |   |   | M |   | D | W | G | T | L | H | T | F | I | G | G | V | N | K | H | S | T | S | I | G | K |   |
| GJB4      | Cx30.3        |   |   |   | M |   | N | W | A | F | L | Q | G | L | L | S | G | V | N | K | Y | S | T | V | L | S | R |   |
| GJB3      | Cx31          |   |   |   | M |   | D | W | K | T | L | Q | A | L | L | S | G | V | N | K | Y | S | T | A | F | G | R |   |
| GJB5      | Cx31.1        |   |   |   | M |   | N | W | S | I | F | E | G | L | L | S | G | V | N | K | Y | S | T | A | F | G | R |   |
| GJB1      | Cx32          |   |   |   | M |   | N | W | T | G | L | Y | T | L | L | S | G | V | N | R | H | S | T | A | I | G | R |   |
| GJC3      | Cx30.2/Cx31.3 |   |   |   | M |   | C | G | R | F | L | R | R | L | L | A | E | E | S | R | R | S | T | P | V | G | R |   |
| GJC1      | Cx45          |   |   |   | M |   | S | W | S | F | L | T | R | L | L | E | E | I | H | N | H | S | T | F | V | G | K |   |
| GJC2      | Cx47          | M | T | N | M |   | S | W | S | F | L | T | R | L | L | E | E | I | H | N | H | S | T | F | V | G | K |   |
| GJD3      | Cx31.9        |   |   |   | M | G | E | W | A | F | L | G | S | L | L | D | A | V | Q | L | Q | S | P | L | V | G | R |   |
| GJD2      | Cx36          |   |   |   | M | G | E | W | T | I | L | E | R | L | L | E | A | A | V | Q | Q | H | S | T | M | I | G | R |
| GJD4      | Cx40.1        |   |   |   | M | E | G | V | D | L | L | G | F | L | I | I | T | L | N | C | N | V | T | M | V | G | K |   |
| Consensus |               |   |   |   | M | - | D | W | - | F | L | - | - | L | L | - | - | V | - | - | H | S | T | - | - | G | K |   |

B

|           |        |   |   |   |   |   |   |   |   |   |   |   |   |   |   |   |   |   |   |   |   |   |   |   |   |   |   |   |
|-----------|--------|---|---|---|---|---|---|---|---|---|---|---|---|---|---|---|---|---|---|---|---|---|---|---|---|---|---|---|
| GJA6      | Cx33   |   |   |   | M | S | D | W | S | A | L | H | Q | L | L | E | K | V | Q | P | Y | S | T | A | G | G | K |   |
| GJA4      | Cx37   |   |   |   | M | G | D | W | G | F | L | E | K | L | L | D | Q | V | Q | E | H | S | T | V | V | G | K |   |
| GJA5      | Cx40   |   |   |   | M | G | D | W | S | F | L | G | E | F | L | E | E | V | H | K | H | S | T | V | I | G | K |   |
| GJA1      | Cx43   |   |   |   | M | G | D | W | S | A | L | G | K | L | L | D | K | V | Q | A | Y | S | T | A | G | G | K |   |
| GJA3      | Cx46   |   |   |   | M | G | D | W | S | F | L | G | R | L | L | E | N | A | Q | E | H | S | T | V | I | G | K |   |
| GJA8      | Cx50   |   |   |   | M | G | D | W | S | F | L | G | N | I | L | E | E | V | N | E | H | S | T | V | I | G | R |   |
| GJA10     | Cx57   |   |   |   | M | G | D | W | N | L | L | G | G | I | L | E | E | V | H | S | H | S | T | I | V | G | K |   |
| GJB2      | Cx26   |   |   |   | M |   | D | W | G | T | L | Q | S | I | L | G | G | V | N | K | H | S | T | S | I | G | K |   |
| GJB6      | Cx30   |   |   |   | M |   | D | W | G | T | L | H | T | V | I | G | G | V | N | K | H | S | T | S | I | G | K |   |
| GJB4      | Cx30.3 |   |   |   | M |   | N | W | G | F | L | Q | G | I | L | S | G | V | N | K | Y | S | T | A | L | G | R |   |
| GJB3      | Cx31   |   |   |   | M |   | D | W | K | K | L | Q | D | L | L | S | G | V | N | Q | Y | S | T | A | F | G | R |   |
| GJB5      | Cx31.1 |   |   |   | M |   | N | W | S | V | F | E | G | L | L | S | G | V | N | K | Y | S | T | A | F | G | R |   |
| GJB1      | Cx32   |   |   |   | M |   | N | W | T | G | L | Y | T | L | L | S | G | V | N | R | H | S | T | A | I | G | R |   |
| GJC1      | Cx45   |   |   |   | M |   | S | W | S | F | L | T | R | L | L | E | E | I | H | N | H | S | T | F | V | G | K |   |
| GJC2      | Cx47   | M | T | N | M |   | S | W | S | F | L | T | R | L | L | E | E | I | H | N | H | S | T | F | V | G | K |   |
| GJD2      | Cx36   |   |   |   | M | G | E | W | T | I | L | E | R | L | L | E | A | A | V | Q | C | H | S | T | M | I | G | R |
| GJD4      | Cx39   |   |   |   | M | E | N | L | N | L | L | G | F | L | F | I | T | L | N | C | N | V | T | I | M | G | R |   |
| Consensus |        |   |   |   | M | - | D | W | - | - | L | - | - | L | L | - | - | V | N | - | H | S | T | - | - | G | K |   |

**Figure S1.** Comparison of the amino acid sequences of the amino terminal domains of the 20 human (A) [1] and 17 rat (B) connexins. The connexins are grouped according to sub-families (GJA, GJB, etc.) and then ordered by increasing molecular weight. Gaps were allowed to maximize the identities among sequences. The consensus sequence requires  $\geq 50\%$  identity at a given position. The conserved LIR residues are marked in colour.

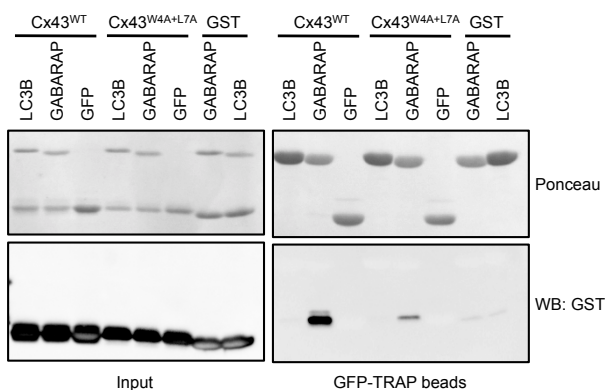

**Figure S2.** The LIR motif in the amino terminal of Cx43 interacts with GABARAP in vitro. (A) Recombinant GFP-LC3B or GFP-GABARAP were bound to GFP-Trap beads and subsequently incubated with peptides comprising the amino terminal of wild type (NT<sup>WT</sup>) or W4A+L7A mutant (NT<sup>W4A+L7A</sup>) Cx43 fused to GST. Precipitates were then analysed by Western Blot using goat polyclonal antibodies against GST.
