# Supplementary material for: A Conserved LIR Motif in Connexins Mediates Ubiquitin-Independent Binding to LC3/GABARAP Proteins
Source: Cells. 2020 Apr 7;9(4):902. doi: 10.3390/cells9040902 (PMC7226732; doi:10.3390/cells9040902)
Supplement: Supplementary file 1 [file cells-09-00902-s001.zip › Table S1.pdf]

| Connexin protein                | Details                                                                                                                   | Interaction with LC3/GABARAP |
|---------------------------------|---------------------------------------------------------------------------------------------------------------------------|------------------------------|
| Cx43 <sup>W4A+L7A</sup>         | Mutation of the LIR motif                                                                                                 | Decreased                    |
| Cx43 <sup>Y265A</sup>           | Mutation of tyrosine-sorting signal<br>Accumulates on the plasma membrane                                                 | Decreased                    |
| Cx43 <sup>Y286A</sup>           | Mutation of tyrosine-sorting signal and PPxY motif<br>Accumulates at the plasma membrane<br>Impaired ubiquitination       | Moderately decreased         |
| Cx43 <sup>Y265,286A</sup>       | Mutation of both tyrosine-sorting signals and PPxY motif<br>Accumulates at the plasma membrane<br>Impaired ubiquitination | Decreased                    |
| GST-Cx43 <sup>W4A+L7A</sup> _NT | Mutation of the LIR motif<br>Amino-terminal of protein                                                                    | Decreased                    |
| Cx37 <sup>W4A+L7A</sup>         | Mutation of the LIR motif                                                                                                 | Decreased                    |
| Cx40 <sup>W4A+L7A</sup>         | Mutation of the LIR motif                                                                                                 | Unaffected                   |
| Cx46 <sup>W4A+L7A</sup>         | Mutation of the LIR motif                                                                                                 | Decreased                    |
| Cx50 <sup>W4A+L7A</sup>         | Mutation of the LIR motif                                                                                                 | Decreased                    |

**Table S1.** Description of connexin mutants and their effect on binding to LC3/GABARAP proteins.
